# Supplementary material for: Is L-dopa test effective in detecting adrenal insufficiency with preliminary diagnosis of growth hormone deficiency in children with short stature?
Source: publisher site journal article supplement (doi:10.1515/jpem-2025-0143), 2025-05-29
Supplement: Supplementary file 1 [file j_jpem-2025-0143_suppl_001.docx]

**FLOWCHART**

Evaluation of the results and publication of findings.

Data entry into SPSS and performing statistical analyses.

Retrospective evaluation of the medical records of these patients.

Identification of patients with short stature who underwent growth hormone stimulation testing for diagnostic evaluation.
